# Supplementary material for: A Cas9 Variant for Efficient Generation of Indel-Free Knockin or Gene-Corrected Human Pluripotent Stem Cells
Source: PubMed Central journal article supplement — Stem Cell Reports. 2016 Aug 4;7(3):508–17. doi: 10.1016/j.stemcr.2016.07.001 (PMC5031952; doi:10.1016/j.stemcr.2016.07.001), 2016-08-04
Supplement: mmc1.pdf [file mmc1.pdf]

**Stem Cell Reports, Volume 7**

**Supplemental Information**

**A Cas9 Variant for Efficient Generation of Indel-Free Knockin or Gene-Corrected Human Pluripotent Stem Cells**

**Sara E. Howden, Bradley McColl, Astrid Glaser, Jim Vadolas, Steven Petrou, Melissa H. Little, Andrew G. Elefanty, and Edouard G. Stanley**

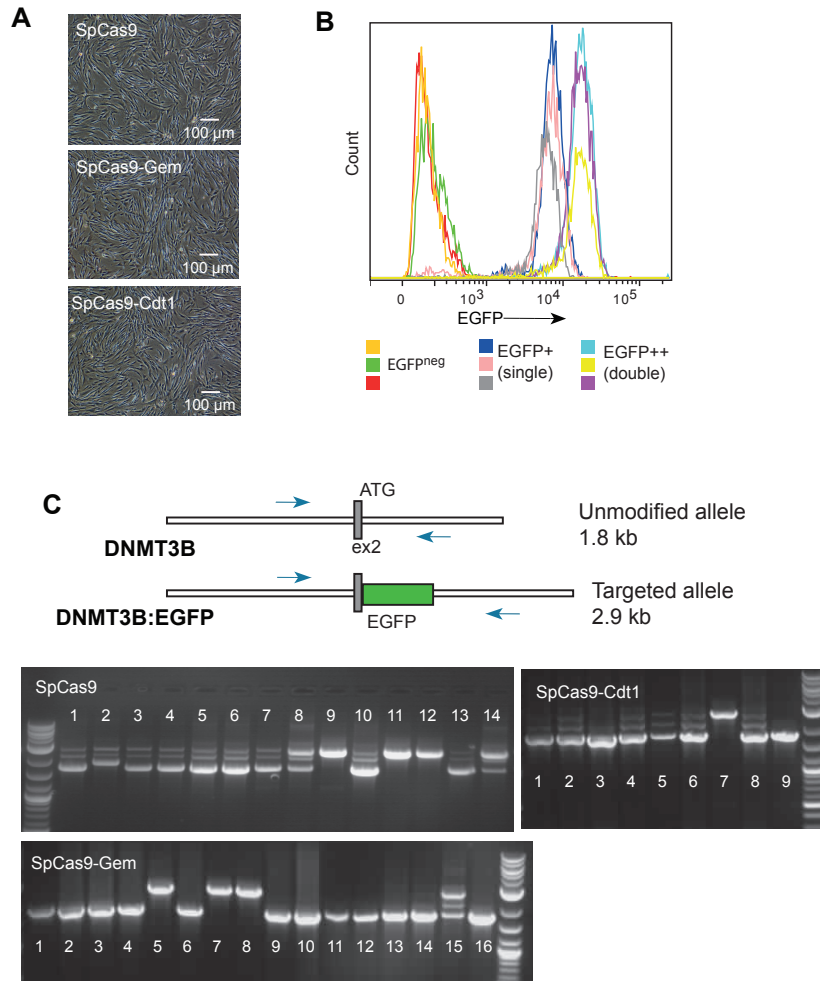

**Figure S1, related to Figure 2. (A)** Micrographs of fibroblast cultures 24 h following transfection of mRNA encoding SpCas9, SpCas9-Gem or SpCas9-Cdt1. **(B)** Flow cytometric analysis of EGFP-expressing clones with either a single DNMT3B allele (EGFP<sup>+</sup>) or both DNMT3B alleles (EGFP<sup>++</sup>) targeted by homologous recombination. **(C)** Schematic of the DNMT3B locus showing location of PCR primers used to screen EGFP-expressing clones and subsequent gel analysis of the PCR products amplified from EGFP-expressing clones. These primers preferentially amplify the untargeted allele in EGFP<sup>+</sup> (mono-allelic) clones, whereas only the larger 2.9 kb band is visible following PCR analysis of EGFP<sup>++</sup> (bi-allelic) clones. Clones where two bands are clearly visible (clones 8 and 14 in SpCas9 panel and clone 15 in SpCas9-Gem panel) exhibited low levels (<15%) of contamination with EGFP non-expressing cells observed by flow cytometry (not shown).

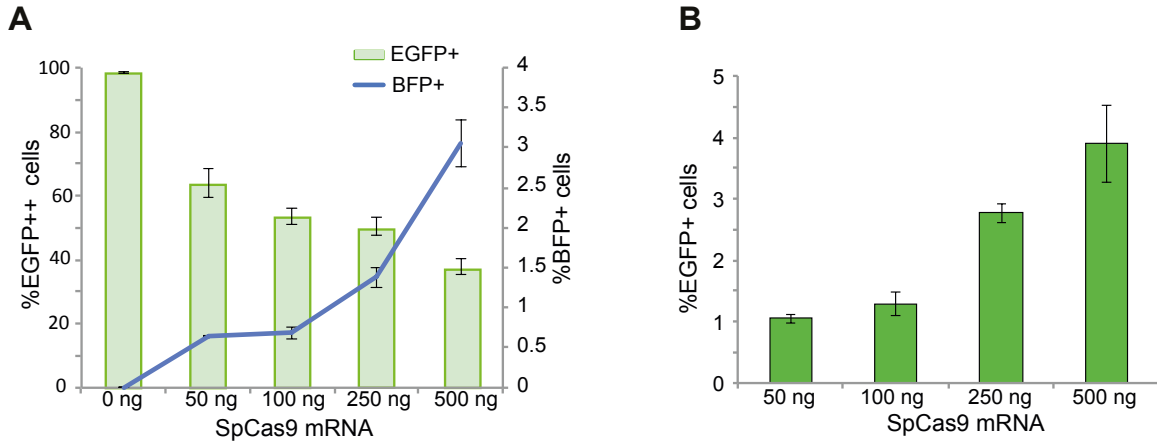

**Figure S2, related to Figure 4. (A)** Graphical plot depicting the proportion of BFP+ (targeting efficiency) and EGFP<sup>neg</sup> cells (NHEJ) assessed 3 days after the co-transfection of 0, 50 ng, 100 ng, 250 ng or 500 ng mRNA encoding SpCas9 with a BFP homologous template in iPSCs constitutively expressing EGFP. Data represent an average  $\pm$  SEM of three independent experiment **(B)** Graphical plot depicting the proportion of EGFP+ (targeting efficiency) assessed 3 days after the co-transfection of 0, 50 ng, 100 ng, 250 ng or 500 ng mRNA encoding SpCas9 with the DNMT3B-EGFP homologous template H9 cells. Data represent an average  $\pm$  SEM of three independent experiments.

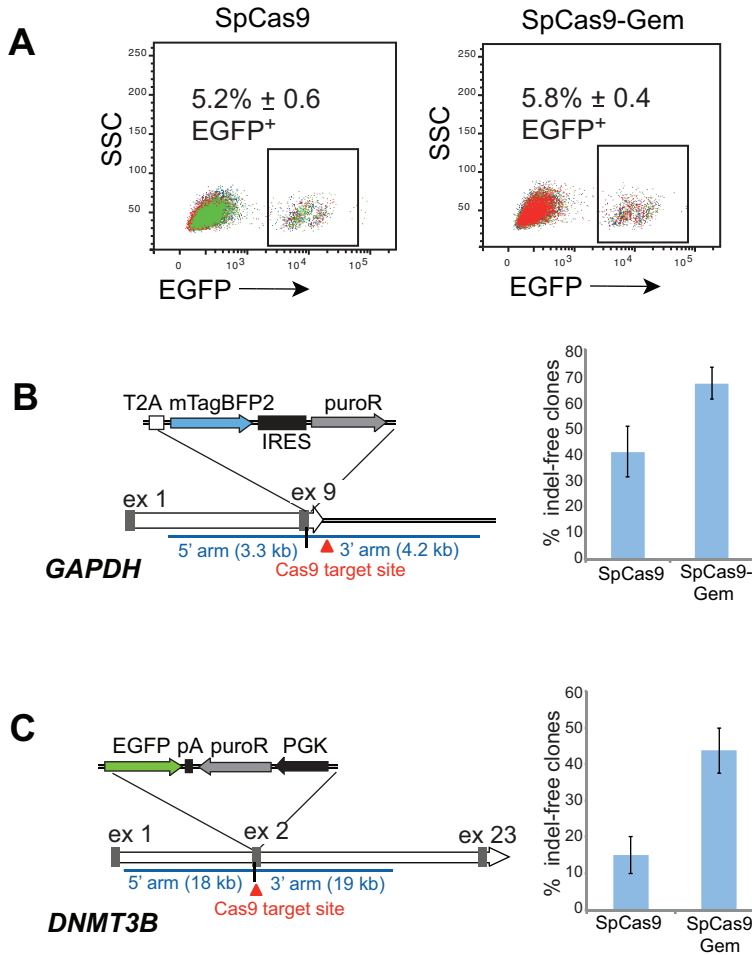

**Figure S3, related to Figure 4. (A)** Targeting efficiency associated with SpCas9 and SpCas9-Gem assessed by flow cytometric analysis following targeting of EGFP to the DNMT3B locus in H9 cells. An overlay of three independent experiments is shown. **(B)** Schematic diagram of the GAPDH targeting strategy and proportion of puromycin resistant/mTagBFP2+ clones identified without disruption of the other untargeted GAPDH allele associated with SpCas9 or SpCas9-Gem. A total of 78 colonies were isolated and screened (40 for SpCas9, 38 for SpCas9-Gem) from three independent experiments. **(C)** Schematic diagram of the DNMT3B targeting strategy and proportion of puromycin resistant/EGFP+ clones identified without disruption of the other untargeted DNMT3B allele associated with SpCas9 or SpCas9-Gem. A total of 40 colonies were isolated and screened (20 for SpCas9, 20 for SpCas9-Gem) from two independent experiments. Data represent mean  $\pm$  SEM.

**Table S1, related to Figure 2.** Analysis of EGFP<sup>+</sup> clones isolated and expanded following simultaneous reprogramming and targeting of EGFP to DNMT3B locus. Three independent experiments were performed, as indicated. Clones that had EGFP targeted to both DNMT3B alleles are highlighted green. Clones that had EGFP targeted to one DNMT3B allele with no indels on the second DNMT3B allele are highlighted blue.

| Experiment 3        | SpCas9 |                   | SpCas9-Gem |              | SpCas9-Cdt1 |              |
|---------------------|--------|-------------------|------------|--------------|-------------|--------------|
|                     | CLN    | INDEL (Y/N)       | CLN        | INDEL (Y/N)  | CLN         | INDEL (Y/N)  |
|                     | 1      | Y - 1bp INS       | 1          | Y - 1bp INS  | 1           | Y - 1bp INS  |
|                     | 2      | Y - 180bp INS     | 2          | Y - 1bp INS  | 2           | N            |
|                     | 3      | Y - 23bp DEL      | 3          | Y- 9bp DEL   | 3           | Y            |
|                     | 4      | Y - 1bp INS       | 4          | N            | 4           | Y - 1bp INS  |
|                     | 5      | Y - 2bp INS       | 5          | N/A          | 5           | Y - 1bp INS  |
|                     | 6      | Y - 1bp INS       | 6          | Y - 8bp DEL  | 6           | Y - 2bp DEL  |
|                     | 7      | Y - 1bp DEL       | 7          | N/A          | 7           | N/A          |
|                     | 8      | N/A               | 8          | N/A          | 8           | Y - 1bp INS  |
|                     | 9      | N/A               | 9          | Y - 22bp DEL |             |              |
|                     | 10     | Y - 1bp INS       | 10         | N            |             |              |
|                     | 11     | N/A               | 11         | N            |             |              |
|                     | 12     | N/A               | 12         | Y - 60bp DEL |             |              |
|                     | 13     | Y - 1bp INS       | 13         | Y- 3bp DEL   |             |              |
|                     | 14     | N/A               | 14         | Y - 1bp INS  |             |              |
|                     | 15     | N/A               | 15         | N/A          |             |              |
|                     | 16     | N/A               | 16         | N            |             |              |
|                     | 17     | N/A               |            |              |             |              |
|                     |        |                   |            |              |             |              |
| <b>Experiment 2</b> | 18     | Y - 6pb DEL       | 17         | Y - 3bp DEL  | 9           | Y- 400bp INS |
|                     | 19     | Y - 8bp DEL       | 18         | Y- 7bp DEL   | 10          | N            |
|                     | 20     | N/A               | 19         | N            | 11          | Y - 3bp INS  |
|                     | 21     | Y - 1bp INS       | 20         | N            | 12          | Y - 20bp DEL |
|                     | 22     | Y - 22bp DEL      | 21         | N/A          | 13          | Y            |
|                     | 23     | Y - >1kb INS      |            |              |             |              |
|                     | 24     | indel within EGFP |            |              |             |              |
|                     |        |                   |            |              |             |              |
| <b>Experiment 1</b> | 25     | Y- 8bp DEL        | 22         | Y- 1bp INS   | 14          | Y- 2bp DEL   |
|                     | 26     | N/A               | 23         | N            | 15          | Y- 1bp INS   |
|                     | 27     | Y- 1bp INS        | 24         | Y- 1bp INS   | 16          | Y- 1bp INS   |
|                     | 28     | Y- 1bp INS        | 25         | N            | 17          | Y- 3bp DEL   |
|                     |        |                   | 26         | Y - 6p DEL   |             |              |
|                     |        |                   | 27         | N/A          |             |              |
|                     |        |                   | 28         | Y- 1bp INS   |             |              |

**Table S2, related to Figure 2.** Analysis of EGFP<sup>neg</sup> clones isolated and expanded following simultaneous reprogramming and targeting of EGFP to DNMT3B locus. Three independent experiments were performed, as indicated.

|             | <b>SpCas9</b> |                    | <b>SpCas9-Gem</b> |                    | <b>SpCas9-Cdt1</b> |                    |
|-------------|---------------|--------------------|-------------------|--------------------|--------------------|--------------------|
| <b>Exp3</b> | <b>CLN</b>    | <b>INDEL (Y/N)</b> | <b>CLN</b>        | <b>INDEL (Y/N)</b> | <b>CLN</b>         | <b>INDEL (Y/N)</b> |
|             | A             | Y- both alleles    | A                 | N                  | A                  | Y- both alleles    |
|             | B             | Y- both alleles    | B                 | N                  | B                  | Y- one allele      |
|             | C             | Y- both alleles    | C                 | Y- both alleles    | C                  | Y- both alleles    |
|             | D             | Y- both alleles    | D                 | N                  | D                  | Y- one allele      |
|             | E             | Y- both alleles    | E                 | Y- both alleles    | E                  | Y- one allele      |
|             | F             | Y- both alleles    | F                 | Y- one allele      | F                  | Y- one allele      |
|             | G             | Y- both alleles    | G                 | N                  | G                  | Y- both alleles    |
|             | H             | Y- both alleles    | H                 | N                  | H                  | Y- both alleles    |
|             | I             | Y- both alleles    | I                 | N                  | I                  | Y- one allele      |
|             | J             | Y- both alleles    | J                 | N                  | J                  | Y- both alleles    |
|             |               |                    |                   |                    |                    |                    |
| <b>Exp2</b> | K             | Y- both alleles    | K                 | Y - both alleles   | K                  | Y- both alleles    |
|             | L             | Y - both alleles   | L                 | Y- both alleles    | L                  | Y- both alleles    |
|             | M             | Y - both alleles   | M                 | N                  | M                  | N                  |
|             | N             | Y - both alleles   | N                 | N                  | N                  | Y- one allele      |
|             | O             | Y- both alleles    | O                 | N                  | O                  | Y- both alleles    |
|             | P             | Y- both alleles    | P                 | Y- one allele      | P                  | Y- both alleles    |
|             |               |                    |                   |                    |                    |                    |
| <b>Exp1</b> | Q             | Y - both alleles   | Q                 | N                  | Q                  | Y- both alleles    |
|             | R             | Y - one allele     | R                 | N                  | R                  | Y- one allele      |
|             | S             | Y - both alleles   | S                 | Y - one allele     | S                  | Y- one allele      |
|             | T             | Y - both alleles   | T                 | N                  | T                  | Y- one allele      |
|             | U             | Y - one allele     | U                 | N                  | U                  | Y- both alleles    |
|             | V             | Y - both alleles   | V                 | N                  | V                  | Y- one allele      |
|             | W             | Y - both alleles   | W                 | Y - both alleles   |                    |                    |
|             | X             | Y - both alleles   |                   |                    |                    |                    |
|             | Y             | Y - both alleles   |                   |                    |                    |                    |

**Table S3, related to Figure 3.** Analysis of iPSC clones isolated and expanded following simultaneous reprogramming and gene correction of fibroblasts from patient with an autosomal dominant mutation in SCN2A

| <b>SpCas9</b> |                     |               | <b>SpCas9-Gem</b> |                 |                        | <b>SpCas9-Cdt1</b> |                 |                        |
|---------------|---------------------|---------------|-------------------|-----------------|------------------------|--------------------|-----------------|------------------------|
| <b>CLN</b>    | <b>INDEL</b>        | <b>REPAIR</b> | <b>CLN</b>        | <b>INDEL</b>    | <b>REPAIR</b>          | <b>CLN</b>         | <b>INDEL</b>    | <b>REPAIR</b>          |
| 1             | Y- both alleles     | N             | 1                 | N               | N                      | 1                  | Y- wt allele    | N                      |
| 2             | N                   | N             | 2                 | N               | N                      | 2                  | Y- mut allele   | N                      |
| 3             | N                   | N             | 3                 | Y- mut allele   | N                      | 3                  | Y- wt allele    | N                      |
| 4             | Y- wt allele        | <b>Y</b>      | 4                 | N               | N                      | 4                  | Y- mut allele   | N                      |
| 5             | Y- both alleles     | N             | 5                 | <b>N</b>        | <b>Y- both alleles</b> | 5                  | N               | N                      |
| 6             | Y- both alleles     | N             | 6                 | N               | no                     | 6                  | Y- both alleles | N                      |
| 7             | Y- both alleles     | N             | 7                 | N               | no                     | 7                  | Y- wt allele    | N                      |
| 8             | Y- both alleles     | N             | 8                 | N               | no                     | 8                  | Y- mut allele   | N                      |
| 9             | Y- both alleles     | N             | 9                 | Y- mut allele   | N                      | 9                  | N               | N                      |
| 10            | Y- mut allele       | N             | 10                | <b>N</b>        | <b>Y- both alleles</b> | 10                 | Y- mut allele   | N                      |
| 11            | Y- both alleles     | N             | 11                | N               | N                      | 11                 | Y- mut allele   | N                      |
| 12            | Y- both alleles     | N             | 12                | N               | N                      | 12                 | Y- mut allele   | N                      |
| 13            | Y- both alleles     | N             | 13                | N               | N                      | 13                 | N               | N                      |
| 14            | Y- both alleles     | N             | 14                | N               | N                      | 14                 | Y- mut allele   | N                      |
| 15            | Y- both alleles     | N             | 15                | N               | N                      | 15                 | Y- both alleles | N                      |
| 16            | Y- both alleles     | N             | 16                | N               | N                      | 16                 | N               | N                      |
| 17            | <b>N</b>            | <b>Y</b>      | 17                | N               | N                      | 17                 | Y- wt allele    | N                      |
| 18            | Y- both alleles     | N             | 18                | N               | N                      | 18                 | N               | N                      |
| 19            | Y- both alleles     | N             | 19                | N               | N                      | 19                 | N               | N                      |
| 20            | Y- both alleles     | N             | 20                | N               | N                      | 20                 | Y- mut allele   | N                      |
| 21            | Y- mut allele       | N             | 21                | Y- wt allele    | <b>Y</b>               | 21                 | Y- mut allele   | N                      |
| 22            | <b>Y- wt allele</b> | <b>Y</b>      | 22                | N               | N                      | 22                 | Y- mut allele   | N                      |
| 23            | Y- both alleles     | N             | 23                | N               | N                      | 23                 | Y- both alleles | N                      |
| 24            | Y- mut allele       | N             | 24                | N               | N                      | 24                 | Y- both alleles | N                      |
| 25            | Y- both alleles     | N             | 25                | <b>N</b>        | <b>Y- both alleles</b> | 25                 | N               | N                      |
| 26            | Y- both alleles     | N             | 26                | N               | N                      | 26                 | Y- mut allele   | N                      |
| 27            | Y- both alleles     | N             | 27                | <b>N</b>        | <b>Y- both alleles</b> | 27                 | N               | N                      |
| 28            | Y- both alleles     | N             | 28                | Y-mut allele    | N                      | 28                 | Y- both alleles | N                      |
| 29            | N                   | N             | 29                | Y- both alleles | N                      | 29                 | Y- wt allele    | N                      |
| 30            | Y- both alleles     | N             | 30                | Y- wt allele    | N                      | 30                 | N               | <b>Y- both alleles</b> |
| 31            | Y- both alleles     | N             |                   |                 |                        | 31                 | Y- mut allele   | N                      |

**Table S4, related to experimental procedures. Oligonucleotide sequences**

| ODN | Sequence                                                 | Purpose                                                                 |
|-----|----------------------------------------------------------|-------------------------------------------------------------------------|
| 1   | Cas9ecoF                                                 | Amplification of SpCas9 sequence                                        |
| 2   | ctcgagcggcccgagctgtgatggatatccctgtcagcc<br>ctgctgtctccac | Amplification of SpCas9 sequence                                        |
| 3   | agggatatccatcacactgg                                     | Amplification of Geminin/Cdt1                                           |
| 4   | cagtaccggtagattacagcgcctttctcc                           | Amplification of Geminin                                                |
| 5   | cagtaccggtagattagatggtgtcctgg                            | Amplification of Cdt1                                                   |
| 6   | cagtagatctagcaaaggcaagtgacttgg                           | Amplification of 5' DNMT3B arm and part<br>of EFPP for targeting vector |
| 7   | cagtcatatgaacttcagggt                                    | Amplification of 5' DNMT3B arm and part<br>of EFPP for targeting vector |
| 8   | caccgctcccacaggaaagcatga                                 | Generation of DNMT3B sgRNA                                              |
| 9   | aaactcatgctttcctgtgggagc                                 | Generation of DNMT3B sgRNA                                              |
| 10  | ctcgttctctatctaactcctgg                                  | Amplification of DNMT3B (binds upstream<br>of start codon)              |
| 11  | ggaccactaactacatttcc                                     | Amplification of DNMT3B (binds<br>downstream of start codon)            |
| 12  | ggcaagagcatcaccttaag                                     | Sequencing of DNMT3B PCR product                                        |
| 13  | caccgatttaccagctggaatgat                                 | Generation of SCN2A sgRNA                                               |
| 14  | aaacatcattccagctggtaaatc                                 | Generation of SCN2A sgRNA                                               |
| 15  | gccagtagtagaaatgttg                                      | Amplification of SCN2A gene (exon 14)                                   |
| 16  | ctaagaagagaagtgtagac                                     | Amplification of SCN2A gene (exon 14)                                   |
| 17  | gacttaatccgtgtactc                                       | Sequencing of SCN2A PCR product                                         |
| 18  | caccgcactgcacgccgtaggtca                                 | Generation of EGFP sgRNA                                                |
| 19  | aaactgacctacggcgtgcagtgc                                 | Generation of EGFP sgRNA                                                |

**Table S5, related to experimental procedures. DNA/mRNA concentrations used for transfection experiments**

|                        | <b>DNMT3B<br/>knockin (fib)</b> | <b>SCN2A gene<br/>correction<br/>(fib)</b> | <b>EGFP to BFP<br/>conversion<br/>(iPSC)</b> | <b>GAPDH and<br/>DNMT3B<br/>(H9)</b> |
|------------------------|---------------------------------|--------------------------------------------|----------------------------------------------|--------------------------------------|
| pEP4EO2SEN2L           | 2.5 µg                          | 2.5 µg                                     | -                                            |                                      |
| pEP4EO2SET2K           | 2.5 µg                          | 2.5 µg                                     | -                                            |                                      |
| pEP4EO2SEM2K           | 2.5 µg                          | 2.5 µg                                     | -                                            |                                      |
| pSimple-miR302/367     | 2.5 µg                          | 2.5 µg                                     | -                                            |                                      |
| EBNA1 mRNA             | 5 µg                            | 5 µg                                       | -                                            |                                      |
| sgRNA plasmid          | 2 µg                            | 2 µg                                       | 0.5 µg                                       | 2 µg                                 |
| Cas9 mRNA              | 5 µg                            | 5 µg                                       | 0.5 µg                                       | 5 µg                                 |
| Gene targeting plasmid | 5 µg                            | 5 µg                                       | 2 µg                                         | 5 µg                                 |



**DNMT3B gblock**

PHOS//AAGTTAgatctcatatgCACCACCGGCAAGCTGCCCGTGCCCTGGCCCCACCCTCGTGACC  
ACCCTGACCTACGGCGTGCAGTGCTTCAGCCGCTACCCCGACCACATGAAGCAGCAGGACT  
TCTTCAAGTCCGCCATGCCCGAAGGCTACGTCCAGGAGCGCACCATCTTCTTCAAGGACGA  
CGGCAACTACAAGACCCGCGCCGAGGTGAAGTTCGAGGGCGACACCCTGGTGAACCGCAT  
CGAGCTGAAGGGCATCGACTTCAAGGAGGACGGCAACATCCTGGGGCACAAGCTGGAGTA  
CAACTACAACAGCCACAACGTCTATATCATGGCCGACAAGCAGAAGAACGGCATCAAGGTG  
AACTTCAAGATCCGCCACAACATCGAGGACGGCAGCGTGCAGCTCGCCGACCACTACCAGC  
AGAACACCCCATCGGGCAGCGCCCGTGTCTGCTGCCCGACAACCACTACCTGAGCACCC  
AGTCCGCCCTGAGCAAAGACCCCAACGAGAAGCGCGATCACATGGTCCTGCTGGAGTTCGT  
GACCGCCGCCGGGATCACTCTCGGCATGGACGAGCTGTACAAGTAAAGCGGCCGCGACTC  
TAGATCATAATCAGCCATACCACATTTGTAGAGGTTTTACTTGTCTTAAAAAACCTCCCACAC  
CTCCCCCTGAACCTGAAACATAAAATGAATGCAATTGTTGTTGTTAACTTGTATTGACAGCT  
TATAATGGTTACAAATAAAGCAATAGCATCACAAATTTCAAAATAAAGCATTTTTTCACTGC  
AATGAAGGGAGACACCAGGCATCTCAATGGAGAGGAGGACGCCGGCGGGAGGGAAGACTC  
GATCCTCGTCAACGGGGCCTGCAGCGACCAGTCTCCGACTCGCCCCAATCCTGGAGGC  
TATCCGCACCCCGGAGATCAGAGGTGGCTGGGCAGTGGGGACTGGGGTGGTGTGAGGGC  
CTGACATAGTGAGCGGTCACTGCAGACAACCTGGAGGCTTTGGGGAGAGTCTCTGACAACCT  
CCACCACAATTCGCCGGGAGGGAAGAGAGCTCTAGCAAGGAGGGATGCAGGGTCGAGCCC  
TTCACACCTGCCCGCAGCCCTTGGCCTCCCCTTTGGGACTCTCATCTCAGCTGGGACTCTG  
AGCGTGACACAAGGGTGTGTTCCCTGTCTCTGCCAGTCATGACAGGGGTGGTCTCAGC  
ATGGGCCCTTGGAGAGCCCTTCTGCAGTGGGACCCTCTCCCCACTCAGAGCTGGGCTGGG  
GTTGGGAGGGGGAGGTCTGGAGTGTGCTTCCCTTCCACCCTGCCCTGAGCAGCTCCAGCC  
AGCTCACTTGGGATCCCGCCCCAGCTGGGTGGAAAGCCCTGCATTGTCTCTCAGCTGTG  
CCATCCCATGGAACCTTCTGCGAGCGTGAAGGGTTCTATTTCTGCATTGTTCCCCACAATA  
GCCACACTCTACATGGGAGCACTTGAGAAGCGGCT//PHOS

**U6Sptracr gblock**

PHOS//CCAAGCTCGGATCCGATATCGACGTCAAGGTCCGGGCAGGAAGAGGGCCTATTTCCC  
ATGATTCCTTCATATTTGCATATACGATACAAGGCTGTTAGAGAGATAAATTAGAATTAATTTGA  
CTGTAACACAAAGATATTAGTACAAAATACGTGACGTAGAAAGTAATAATTTCTTGGGTAGT  
TTGCAGTTTTAAATATGTTTTAAATGGACTATCATATGCTTACCGTAACTTGAAGTATTT  
CGATTTCTTGGCTTTATATATCTTGTGGAAAGGACGAAACACCGGGTCTTCATTATCCAGAA  
GACAAGTTTTAGAGCTAGAAATAGCAAGTTAAAATAAGGCTAGTCCGTTATCAACTTGAAAAA  
GTGGCACCGAGTCGGTGCCTTTTTTTTTCGCGCCGCACCTTGAATTCG//PHOS

**SCN2A 5' gblock**

CACAGAgacgtcGCAAAGTCCAAAGGAAAACACATAACACAATTTGAGAGATTAGCTCAAACA  
GGGGCACTTCTTTTCAATTTAACAAGAAGAGAAAAGGCAAAGCACAGTTACGGATGTAAGTAGT  
CTAGTAGATAAAGGGAAACAAAGTTCAGGCTGGCTGACTTTCATCACCTCTAAGACGCTGAA  
GTACTGAGACTGTGCTTCTCAGATGGGAAGGCATAAGCAAAAATGGCTGAGGTTATGTGCA  
GAAGAGAAAGTTTTGAAATAGTTTTAGATAATAGAAATGGAGAAAGGAAAATACTGCTTCCCTT  
TCGCCAACAAAAGGAAATTTTTTAAAGAGTTCCTACTATCTGTAGAGCTAGCCGTGAGCATGT  
TTATTACAGCTTACATGACATCTTAGCACCAAGTCTCATCTGCAGGGCCAAGGGAGGGGACCA  
ATCCATTTGGCTTGGTGTGGAAGCCCGCACTGCTAGGTAATCATTTGGTAAGTTTTTGGAG  
GGCTAGAAAGATCAGAGACAGAGCCAAACAGTTGATCACAATGAGTCAGTTGCACCTTTCAT  
ATGAAAATAATATTAATTTTATTGACTTAATCCGTGACTCTTTATCATTTGATAAACATTATAT  
ATAGTGAACAATTATTGATTTGAATGCAAAGCATTTGTAGATACTAAGTTGTTGGACCTAAC  
CAATTTTTTAAATCAGAATTTAATTTATATTTGTTGGGAGTAAATTAAGTTGCTCAATAATTAT  
TCGTGTTTCAAGAGTATTTGCTCATATAATGAACTACACTTCTCATTTAGGTCTTCACAGGA  
TCTTCACAGCAGAAATGTTTCTCAAGATAATTGCCATGGATCCA

**SCN2A 3' gblock**

AATTGCCATGGATCCATATTATTACTTTCAAGAAGGCTGGAATATTTTTGATGGTTTTATTGTG  
AGCCTTAGTTAATGGAACCTGGTTTGGCAAATGTGGAAGGATTGTCAGTTCTCCGAAGCTT  
CCGGCTGGTAAATTAACCTGGGAGTGTTCAAAAATGTACTTTGTAATTAATTAGTCTTCATTCT  
CATCTAGTAAAAATGGCAAGATTTCCCATCATTATAATATTATTTGAATACACTTCTAAAACAA  
ATTGGATTGCCATACCACCAATGGTAGTTTTCTTCTTCATCATAGCTTTAATAAAGTTCACTTA  
AATGAATAGTCTACACTTCTTCTTAGTTATTGAATGGAAGGCTAATAGAGAGGAGGAAACA  
GGGAGTCACAGATAAACTCGAATCACAATTAACAACACCATAGTCAACTCTCAGTTATCTGA  
GGTTTGCAACTGCGTACAAAGCTTCTTGGGACCTAGGATGAGCTCCCCTTTCTGCCAGG  
AACTAAAGAATTATGGAATTGTTCACTTGTCCCGTAGAGGAAAGAGTTAAGACA  
GGGGATAGTGTACAAAGGAGAAGGATAAGCAAACAGAGCTCCCATATGACTGCTGCCACA  
TCAGAAAATCACCAATCACTCTTTGAAAGAGTTAACTGTACTATATTTTGTTAATTTTAAAGA  
AAGTATCTTTCTTTGATCTTTTATAAAAATATTAGATCTTAAATTCAGAGATAAAATATCACT  
TGACACATTTCCAGTGAAAAGTTTGATATGTTTTGTTATACTATTACTTTGAGTTGGCTCTAAGT  
TAGTGATTTATTTTCAAATAACAGAGGCTGTACACGGTTACTAAGGACACGTTTCTATAGATG  
ATTTACCTTAGTAgaattcCAGTGC

**BFP gene block**

GCAGTgacgtcATGGTGAGCAAGGGCGAGGAGCTGTTACCGGGGTGGTGCCCATCCTGGTC  
GAGCTGGACGGCGACGTAACGGCCACAAGTTCAGCGTGAGGGGCGAGGGCGAGGGCGA  
TGCCACCAACGGCAAGCTGACCCTGAAGTTCATCTGCACCACCGGCAAGCTGCCCGTGCCC  
TGGCCCACCCTCGTGACCACCCTGAGCCACGGCGTGCAAGTCTTCCCGCTACCCCGAC  
CACATGAAGCAGCAGACTTCTTCAAGTCCGCCATGCCCGAAGGCTACGTCCAGGAGCGCA  
CCATCTTCTTCAAGGACGACGGCACCTACAAGACCCGCGCCGAGGTGAAGTTCGAGGGCG  
ACACCCTGGTGAACCGCATCGAGCTGAAGGGCGTGCAGTTCAGGAGGACGGCAACATCCT  
GGGGCACAAGCTGGAGTACAACCTTCAACAGCCACAACATCTATATCATGGCCGTCAAGCAG  
AAGAACGGCATCAAGGTGAACCTTCAAGATCCGCCACAACGTGGAGGACGGCAGCGTGCAG  
CTCGCCGACCACTACCAGCAGAACACCCCATCGGCGACGGCCCCGTGCTGCTGCCCGAC  
AGCCACTACCTGAGCACCCAGTCCGTGCTGAGCAAAGACCCCAACGAGAAGCGCGATCACA  
TGGTCCTGCTGGAGTTCGCGACCCGCCGGGATCACTCTCGGCATGGACGAGCTGTACA  
AGTAgaattcCAGTGC
